# Supplementary material
Source: Springer Nature journal article supplement (https://www.springermedizin.de/resource/supplementary/12982_2006_47_MOESM1_ESM.pdf/9604338)

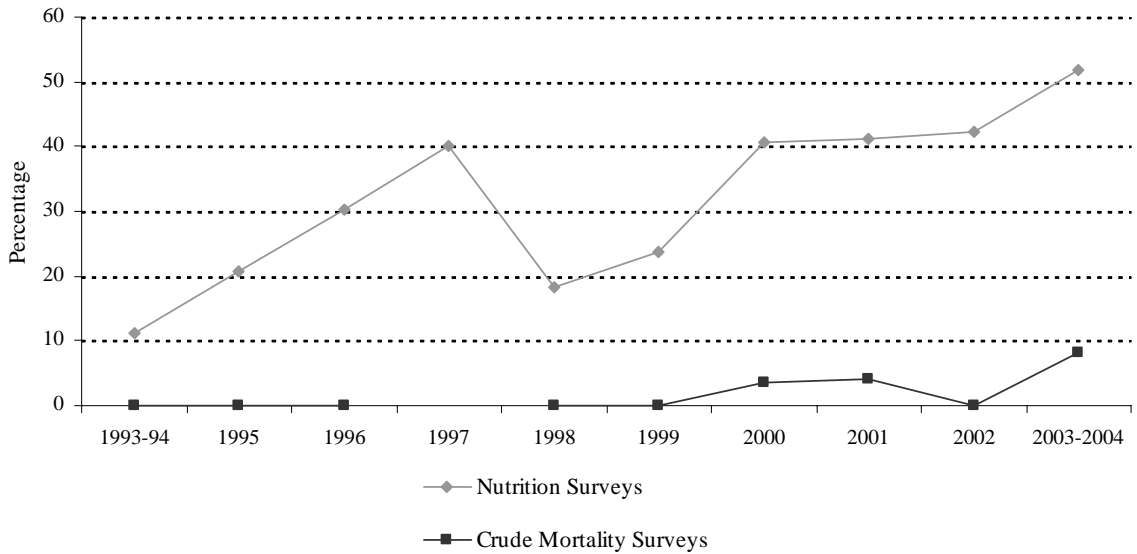

Supplement: MOESM1 [file 9604338]
